# Supplementary material for: Calcium phosphate biomineralization in peptide hydrogels for injectable bone-filling materials
Source: Royal Society of Chemistry journal article supplement (doi:10.1039/c2sm26538a), 2012-01-01
Supplement: c2sm26538a.pdf [file c2sm26538a.pdf]

**Support information for:**  
**Calcium Phosphate Biomineralization in Peptide Hydrogel for  
Injectable Bone-Filling Materials**

Takayuki Nonoyama,<sup>†</sup> Hokuto Ogasawara,<sup>†</sup> Masayoshi Tanaka,<sup>†</sup>  
Masahiro Higuchi,<sup>‡</sup> Takatoshi Kinoshita<sup>†\*</sup>

<sup>†</sup>*Department of Frontier Materials and*

<sup>‡</sup>*Department of Materials Science and Engineering,*

*Graduate School of Engineering, Nagoya Institute of Technology*

<sup>†‡</sup>*Gokiso-cho, Showa-ku, Nagoya, Aichi, 466-8555, Japan*

*E-mail: kinoshita.takatoshi@nitech.ac.jp*

|                                                                                                      |          |
|------------------------------------------------------------------------------------------------------|----------|
| <b>S1. MALDI-TOF-MS spectra of (LE)<sub>8</sub> and (VEVSVKVS)<sub>2</sub>.....</b>                  | <b>2</b> |
| <b>S2. Shear recovery of (VEVSVKVS)<sub>2</sub> hydrogel.....</b>                                    | <b>3</b> |
| <b>S3. EDX mapping images of CaP/(LE)<sub>8</sub> complex.....</b>                                   | <b>4</b> |
| <b>S4. EDX spectrum of mineralized calcium phosphate<br/>in (VEVSVKVS)<sub>2</sub> hydrogel.....</b> | <b>5</b> |

### S1. MALDI-TOF-MS spectra of $(LE)_8$ and $(VEVSVKVS)_2$

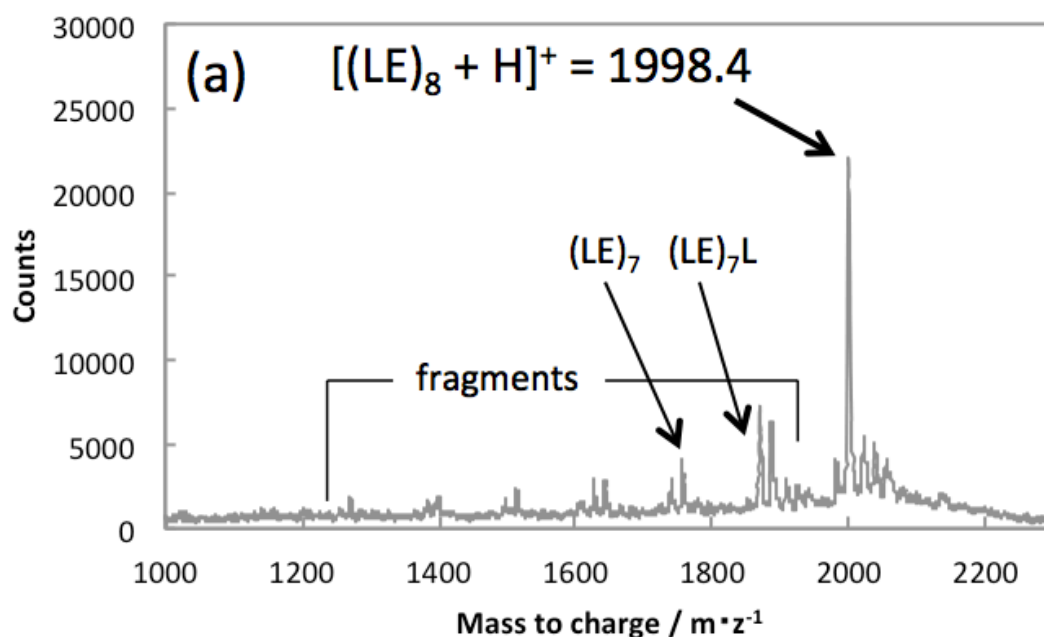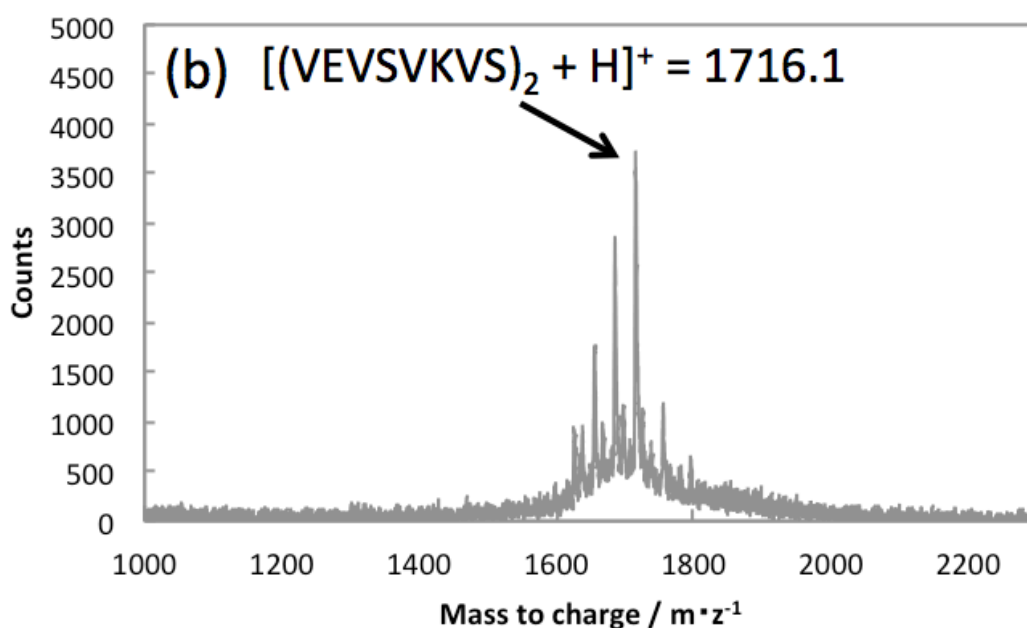

MALDI-TOF-MS spectra of  $(LE)_8$  (a) and  $(VEVSVKVS)_2$  (b).  $\alpha$ -Cyano-4-hydroxycinnamic acid was used as the matrix. These peaks were well agreed with calculated values, respectively  $[(LE)_8] = 1997.2$ ,  $[(VEVSVKVS)_2] = 1715.0$ .

## S2. Shear recovery of (VEVSVKVS)<sub>2</sub> hydrogel

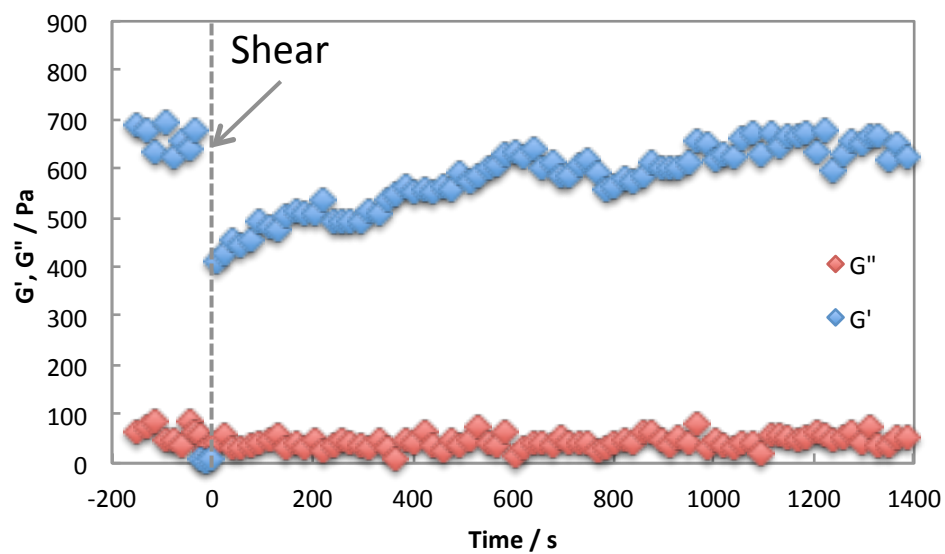

### S3. EDX mapping images of $\text{CaP}/(\text{LE})_8$ complex

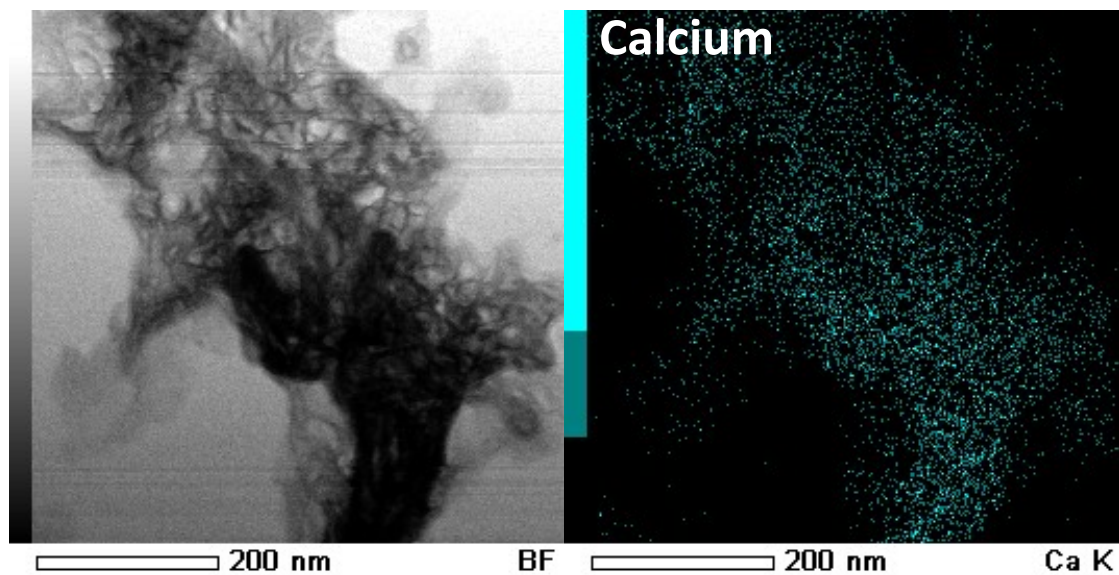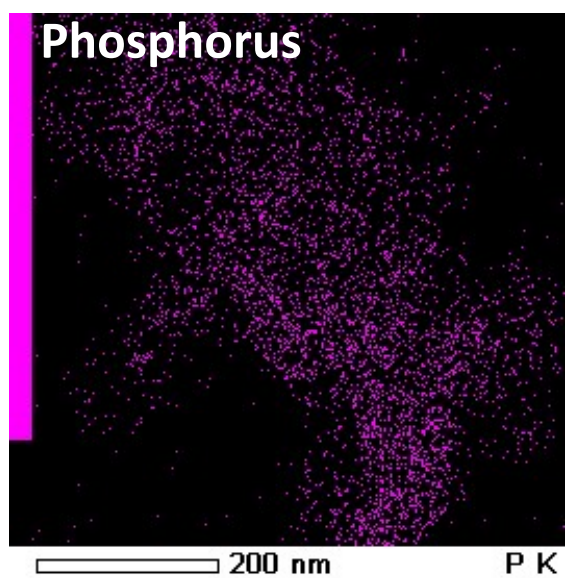

#### S4. EDX spectrum of mineralized calcium phosphate

*in (VEVSVKVS)<sub>2</sub> hydrogel*

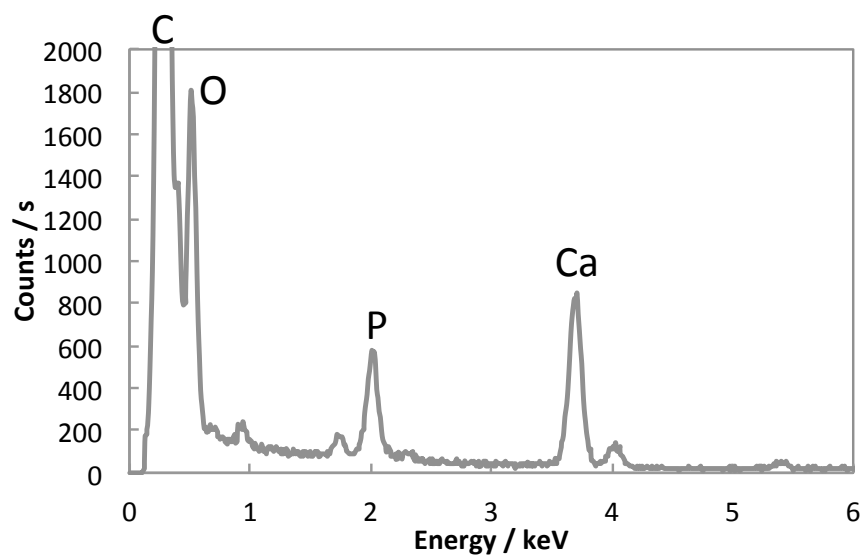

| element | atom / % |
|---------|----------|
| Ca      | 62.7     |
| P       | 37.3     |
